# Supplementary material for: Trans-Ethnical Shift of the Risk Genotype in the CETP I405V with Longevity: A Chinese Case-Control Study and Meta-Analysis
Source: PLoS One. 2013 Aug 15;8(8):e72537. doi: 10.1371/journal.pone.0072537 (PMC3744487; doi:10.1371/journal.pone.0072537)
Supplement: Checklist S1 — PRISMA checklist. (DOC) [file pone.0072537.s001.doc]

| **Section/topic** | **#** | **Checklist item** | **Reported on page #** |
| --- | --- | --- | --- |
| **TITLE** | | |  |
| Title | 1 | Identify the report as a systematic review, meta-analysis, or both.  ***Title*** | ***Page 1*** |
| **ABSTRACT** | | |  |
| Structured summary | 2 | Provide a structured summary including, as applicable: background; objectives; data sources; study eligibility criteria, participants, and interventions; study appraisal and synthesis methods; results; limitations; conclusions and implications of key findings; systematic review registration number.  ***Abstract*** | ***Page 2*** |
| **INTRODUCTION** | | |  |
| Rationale | 3 | Describe the rationale for the review in the context of what is already known.  ***Introduction- Paragraph 3-4*** | ***Page 3*** |
| Objectives | 4 | Provide an explicit statement of questions being addressed with reference to participants, interventions, comparisons, outcomes, and study design (PICOS).  ***Introduction- Paragraph 5***  ***Note: The PICOS structure is not applicable to this paper.*** | ***Page 4*** |
| **METHODS** | | |  |
| Protocol and registration | 5 | Indicate if a review protocol exists, if and where it can be accessed (e.g., Web address), and, if available, provide registration information including registration number.  ***Note: not applicable to this paper for its not a meta-analysis for RCT trials.*** |  |
| Eligibility criteria | 6 | Specify study characteristics (e.g., PICOS, length of follow-up) and report characteristics (e.g., years considered, language, publication status) used as criteria for eligibility, giving rationale.  ***“Identification and eligibility of relevant studies” in method section.*** | ***Page 5*** |
| Information sources | 7 | Describe all information sources (e.g., databases with dates of coverage, contact with study authors to identify additional studies) in the search and date last searched.  ***“Identification and eligibility of relevant studies” in method section.*** | ***Page 5*** |
| Search | 8 | Present full electronic search strategy for at least one database, including any limits used, such that it could be repeated.  ***“Identification and eligibility of relevant studies” in method section.*** | ***Page 5*** |
| Study selection | 9 | State the process for selecting studies (i.e., screening, eligibility, included in systematic review, and, if applicable, included in the meta-analysis).  ***“Identification and eligibility of relevant studies” in method section.*** | ***Page 5*** |
| Data collection process | 10 | Describe method of data extraction from reports (e.g., piloted forms, independently, in duplicate) and any processes for obtaining and confirming data from investigators.  ***“Data extraction and quality control assessment” in method section.*** | ***Page 6*** |
| Data items | 11 | List and define all variables for which data were sought (e.g., PICOS, funding sources) and any assumptions and simplifications made.  ***“Data extraction and quality control assessment” in method section and information in Table 6.*** | ***Page 20*** |
| Risk of bias in individual studies | 12 | Describe methods used for assessing risk of bias of individual studies (including specification of whether this was done at the study or outcome level), and how this information is to be used in any data synthesis.  ***Discussion.*** | ***Page 12*** |
| Summary measures | 13 | State the principal summary measures (e.g., risk ratio, difference in means).  ***“Quantitative Synthesis” in method section.*** | ***Page 8*** |
| Synthesis of results | 14 | Describe the methods of handling data and combining results of studies, if done, including measures of consistency (e.g., I2) for each meta-analysis.  ***“Quantitative Synthesis” in method section.*** | ***Page 8*** |

Page 1 of 2

| **Section/topic** | **#** | **Checklist item** | **Reported on page #** |
| --- | --- | --- | --- |
| Risk of bias across studies | 15 | Specify any assessment of risk of bias that may affect the cumulative evidence (e.g., publication bias, selective reporting within studies).  ***“Publication Bias Analysis” in method section.*** | ***Page 9*** |
| Additional analyses | 16 | Describe methods of additional analyses (e.g., sensitivity or subgroup analyses, meta-regression), if done, indicating which were pre-specified.  ***The Panel 2 of “Quantitative Synthesis” in method section.*** | ***Page 9*** |
| **RESULTS** | | |  |
| Study selection | 17 | Give numbers of studies screened, assessed for eligibility, and included in the review, with reasons for exclusions at each stage, ideally with a flow diagram.  ***“Literature search and characteristics of eligible studies” in results section. And Figure 3*** | ***Page 8*** |
| Study characteristics | 18 | For each study, present characteristics for which data were extracted (e.g., study size, PICOS, follow-up period) and provide the citations.  ***Table 6.*** | ***Page 20*** |
| Risk of bias within studies | 19 | Present data on risk of bias of each study and, if available, any outcome level assessment (see item 12).  ***Please refer to Item 12.*** | ***Page 12*** |
| Results of individual studies | 20 | For all outcomes considered (benefits or harms), present, for each study: (a) simple summary data for each intervention group (b) effect estimates and confidence intervals, ideally with a forest plot.  ***Not applicable in this format for this review. Table 7 could be for reference.*** | ***Page 21*** |
| Synthesis of results | 21 | Present results of each meta-analysis done, including confidence intervals and measures of consistency.  ***Please refer to Table 7.*** | ***Page 21*** |
| Risk of bias across studies | 22 | Present results of any assessment of risk of bias across studies (see Item 15).  ***Please refer to Table 7.*** | ***Page 21*** |
| Additional analysis | 23 | Give results of additional analyses, if done (e.g., sensitivity or subgroup analyses, meta-regression [see Item 16]).  ***Please refer to panel 2 of “Quantitative Synthesis” in results section.*** | ***Page 9*** |
| **DISCUSSION** | | |  |
| Summary of evidence | 24 | Summarize the main findings including the strength of evidence for each main outcome; consider their relevance to key groups (e.g., healthcare providers, users, and policy makers).  ***Discussion*** | ***Page 10-11*** |
| Limitations | 25 | Discuss limitations at study and outcome level (e.g., risk of bias), and at review-level (e.g., incomplete retrieval of identified research, reporting bias).  ***Discussion*** | ***Page 11*** |
| Conclusions | 26 | Provide a general interpretation of the results in the context of other evidence, and implications for future research.  ***The last 2 paragraphs of Discussion section.*** | ***Page 12*** |
| **FUNDING** | | |  |
| Funding | 27 | Describe sources of funding for the systematic review and other support (e.g., supply of data); role of funders for the systematic review.  ***Funding and Author Contributions.*** | ***Page 1*** |

*From:*  Moher D, Liberati A, Tetzlaff J, Altman DG, The PRISMA Group (2009). Preferred Reporting Items for Systematic Reviews and Meta-Analyses: The PRISMA Statement. PLoS Med 6(6): e1000097. doi:10.1371/journal.pmed1000097

For more information, visit: **www.prisma-statement.org**.

Page 2 of 2
